# Supplementary material for: Metabolic Dysfunction at the Core: Revisiting the Overlap of Cardiovascular, Renal, Hepatic, and Endocrine Disorders
Source: MDPI journal article supplement (doi:10.3390/life16010172), 2026-01-20
Supplement: s1 [file Supplementary_Table_S1_Characteristics_of_Incuded_Studies.pdf › Supplementary_Table_S1_Characteristics_of_Incuded_Studies.pdf]

**Table S1. Characteristics of Included Studies**

| <b>First Author (Year)</b>    | <b>Study Design</b>                         | <b>Population / Condition</b>                      | <b>Systems Involved</b>                                       | <b>Primary Focus</b>                                         | <b>Key Findings</b>                                                                                                                                       |
|-------------------------------|---------------------------------------------|----------------------------------------------------|---------------------------------------------------------------|--------------------------------------------------------------|-----------------------------------------------------------------------------------------------------------------------------------------------------------|
| Mutruc et al. (2025) [8]      | Narrative review                            | CKM-related cardiometabolic multimorbidity         | Cardiovascular; renal; metabolic                              | Pathophysiology, epidemiology, and staging of CKM syndrome   | Identifies shared mechanisms linking cardiovascular disease, chronic kidney disease, obesity, and type 2 diabetes within a unified CKM framework.         |
| Godoy-Matos et al. (2025) [9] | Narrative review                            | Metabolic syndrome, MASLD, cardiometabolic disease | Cardiovascular; renal; hepatic; pancreatic; adipose; vascular | CARDIAL-MS multisystem metabolic framework                   | Emphasizes adipose dysfunction, ectopic fat, and hepatokine imbalance as drivers of multisystem metabolic injury; proposes a four-stage CARDIAL-MS model. |
| Marassi & Fadini (2023) [10]  | Narrative review                            | Adults with CKM syndrome                           | Cardiovascular; renal; metabolic; vascular                    | CKM staging and integrated risk framework                    | Demonstrates strong epidemiologic clustering of diabetes, cardiovascular disease, and CKD, with bidirectional risk amplification.                         |
| Targher et al. (2024) [13]    | Narrative review                            | Adults with MASLD/MASH                             | Hepatic; cardiovascular; renal; metabolic; oncologic          | Systemic complications of MASLD                              | MASLD independently associated with cardiovascular events, CKD, and extrahepatic cancers; risk increased with fibrosis severity.                          |
| Hutchison et al. (2023) [14]  | Narrative review                            | Adults with MASLD/MASH                             | Hepatic; endocrine; metabolic                                 | Endocrine regulation of MASLD                                | Hormonal axes modulate hepatic steatosis, fibrosis, and systemic insulin resistance, positioning MASLD as an endocrine–metabolic disorder.                |
| Agustanti et al. (2023) [15]  | Systematic review and meta-analysis         | Adults with MAFLD                                  | Metabolic; renal                                              | MAFLD–CKD association                                        | MAFLD associated with higher prevalent and incident CKD; renal risk increased with advanced hepatic fibrosis.                                             |
| Zhou et al. (2023) [16]       | Systematic review and meta-analysis         | Adults with MAFLD                                  | Hepatic; renal; metabolic                                     | MAFLD and CKD risk                                           | Fibrosis-based MAFLD phenotypes conferred greater CKD risk than steatosis alone.                                                                          |
| Massy & Druke (2025) [17]     | Narrative review                            | CKM syndrome framework                             | Cardiovascular; renal; metabolic; vascular                    | Integrated CKM staging and risk prediction                   | Shows that inclusion of eGFR and albuminuria improves adverse outcome prediction across CKM stages.                                                       |
| Sattar et al. (2021) [18]     | Systematic review and meta-analysis of RCTs | Adults with type 2 diabetes                        | Cardiovascular; renal; metabolic; vascular                    | Cardiovascular and renal outcomes of GLP-1 receptor agonists | GLP-1 receptor agonists reduced major cardiovascular events, mortality, and kidney disease progression, indicating parallel cardio–renal benefit.         |
| McGuire et al. (2021) [19]    | Systematic review and meta-analysis of RCTs | Adults with type 2 diabetes                        | Cardiovascular; renal; metabolic                              | Cardio–renal effects of SGLT2 inhibitors                     | SGLT2 inhibitors reduced heart failure hospitalization and slowed CKD progression, independent of glycemic control.                                       |
| Lincoff et al. (2023) [20]    | Randomized controlled trial                 | Adults with obesity, no diabetes                   | Cardiovascular; renal; metabolic                              | Cardiovascular outcomes of semaglutide                       | Semaglutide reduced major cardiovascular events and mortality, with favorable renal signals.                                                              |

|                                    |                                         |                                                                 |                                           |                                                                        |                                                                                                                                                          |
|------------------------------------|-----------------------------------------|-----------------------------------------------------------------|-------------------------------------------|------------------------------------------------------------------------|----------------------------------------------------------------------------------------------------------------------------------------------------------|
| Zou et al. (2025) [22]             | Population-based prospective cohort     | Adults with osteoarthritis                                      | Cardiovascular; renal; metabolic          | Osteoarthritis and CKM multimorbidity                                  | Osteoarthritis associated with higher risk of dual and triple CKM multimorbidity and accelerated disease progression.                                    |
| Ostrominski et al. (2023) [23]     | Serial cross-sectional population study | U.S. adults (NHANES 1999–2020)                                  | Cardiovascular; renal; metabolic          | Population burden of multimorbidity                                    | Over one quarter of adults had $\geq 1$ cardiometabolic or renal condition; $\sim 8\%$ had triple-system involvement.                                    |
| Lee (2025) [24]                    | Longitudinal cohort study               | Adults with MASLD                                               | Hepatic; cardiovascular; metabolic        | Liver fibrosis and subclinical atherosclerosis                         | Time-updated FIB-4 independently predicted progression of coronary artery calcification.                                                                 |
| Nzobokela et al. (2025) [25]       | Narrative review                        | CRHM-related disorders                                          | Cardiovascular; renal; hepatic; metabolic | Shared mechanisms and biomarkers                                       | Identifies inflammation, oxidative stress, and insulin resistance as shared drivers; highlights suPAR, galectin-3, and GDF-15 as integrative biomarkers. |
| Daschner et al. (2025) [26]        | Observational cohort study              | Adults undergoing coronary angiography                          | Cardiovascular; renal                     | Protein carbamylation and vascular risk                                | Carbamylated albumin associated with arterial stiffness and increased cardiovascular and all-cause mortality.                                            |
| Geertsema et al. (2024) [27]       | Prospective population-based cohort     | General population (PREVEND)                                    | Renal; cardiovascular                     | Oxidative stress and CKD risk                                          | Elevated serum peroxiredoxin-4 independently predicted incident CKD.                                                                                     |
| Zhou et al. (2025) [28]            | Prospective cohort study                | Adults with CKM stages 0–3                                      | Cardiovascular; renal; metabolic          | Adiposity-based metabolic risk indices                                 | TyG-derived indices outperformed BMI in predicting cardiovascular and all-cause mortality.                                                               |
| Zhang et al. (2025) [29]           | Systematic review and meta-analysis     | Adults with and without NAFLD                                   | Cardiovascular; hepatic; metabolic        | Prognostic value of fibrosis scores                                    | FIB-4 and NAFLD Fibrosis Score predicted cardiovascular events and mortality independent of NAFLD status.                                                |
| Theodorakis & Nikolaou (2025) [30] | Narrative review                        | Adults with cardiometabolic disease across CKM and CRHM spectra | Cardiovascular; renal; hepatic; metabolic | Integrated management of CRHM syndrome and role of metabolic therapies | Extends CKM to a CRHM framework incorporating MASLD and highlights coordinated cardio-renal-hepatic benefits of contemporary metabolic therapies.        |
